# Supplementary material for: Vanillic Mannich bases: synthesis and screening of biological activity. Mechanistic insight into the reaction with 4-chloroaniline
Source: Royal Society of Chemistry journal article supplement (doi:10.1039/c4ra03909b), 2014-01-01
Supplement: c4ra03909b1.pdf [file c4ra03909b1.pdf]

**RSC Advances**

**Electronic Supplementary Information**

**Vanillic Mannich Bases: Synthesis and Screening of Biological Activity.**

**Mechanistic Insight into the Reaction with 4-Chloroaniline**

*Vladimir P. Petrović<sup>a</sup>, Dušica Simijonović<sup>a</sup>, Marko N. Živanović<sup>b</sup>, Jelena V. Košarić<sup>b</sup>, Zorica D. Petrović<sup>a</sup>, Svetlana Marković<sup>a</sup> and Snežana D. Marković<sup>b</sup>*

<sup>a</sup>Faculty of Science, University of Kragujevac, Department of Chemistry, Radoja Domanovića 12, 34000 Kragujevac, Serbia

<sup>b</sup>Faculty of Science, University of Kragujevac, Department of Biology and Ecology, Radoja Domanovića 12, 34000 Kragujevac, Serbia

Corresponding author's e-mail address: [vladachem@kg.ac.rs](mailto:vladachem@kg.ac.rs)

Corresponding author's postal address: Faculty of Science, University of Kragujevac, P.O. Box 60, 34000 Kragujevac, Serbia

Corresponding author's telephone and fax numbers: +381 34 336223, +381 34 335040

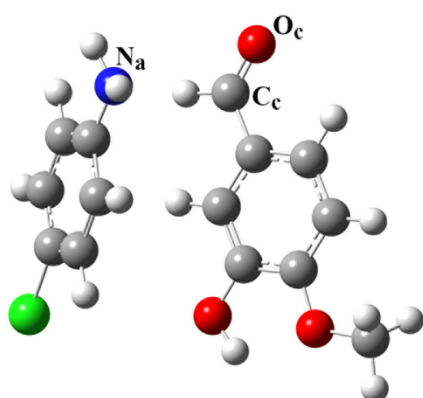

4-chloroaniline and vanillin *S*-reaction complex

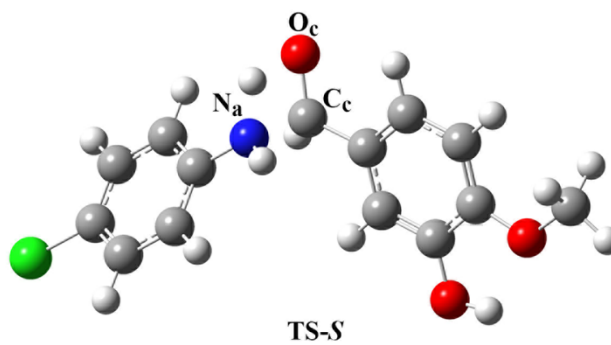

TS-*S*

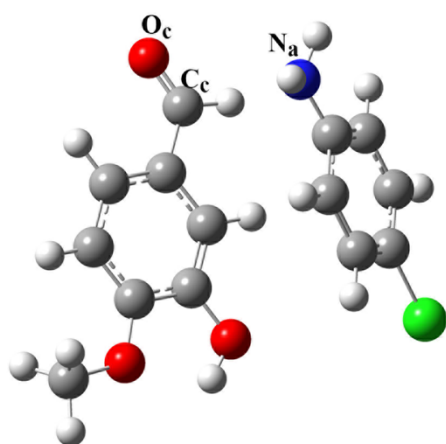

4-chloroaniline and vanillin *R*-reaction complex

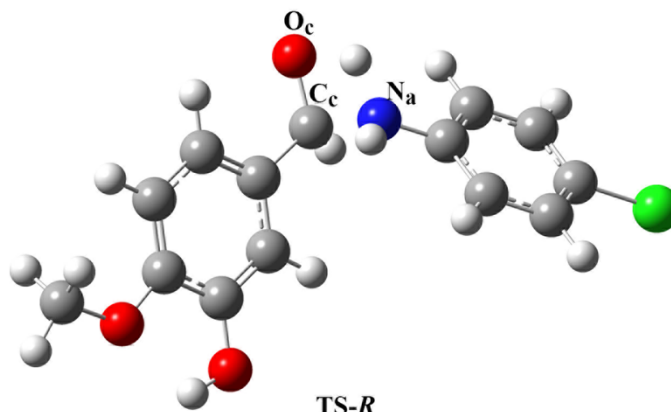

TS-*R*

Figure S1. Nucleophilic attack of the 4-chloroaniline nitrogen at the carbonyl group of vanillin.

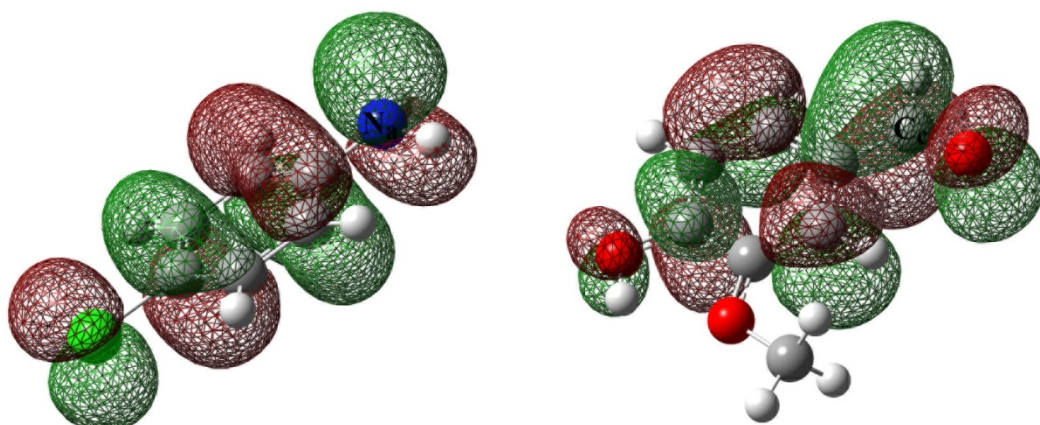

Figure S2. HOMO of 4-chloroaniline and LUMO of vanilin.

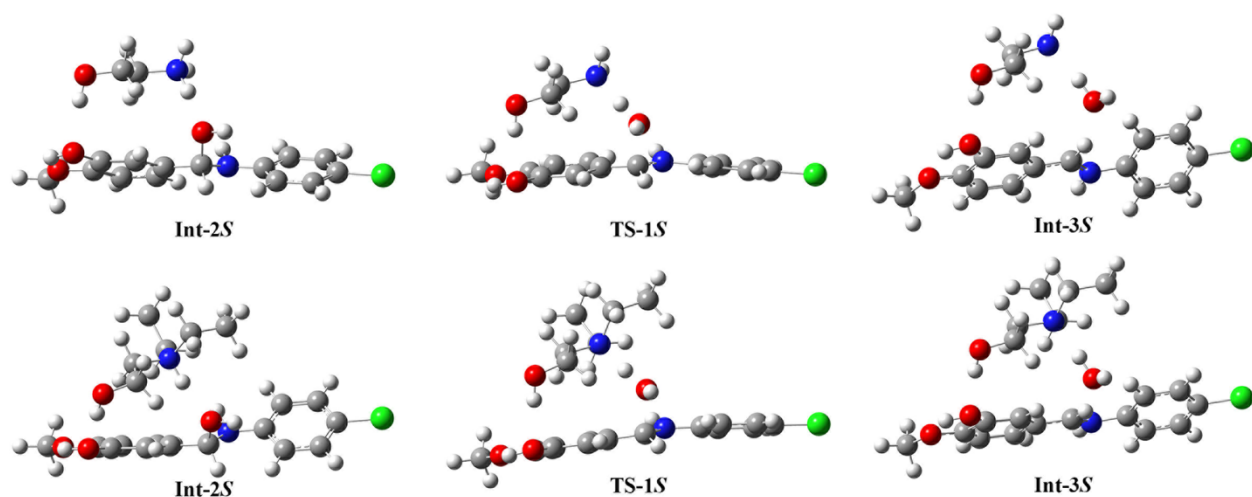

Figure S3. Intermediates and transition states in the transformation of **Int-2S** catalyzed with [HMEA][ClAc] and [HDEAE][ClAc].

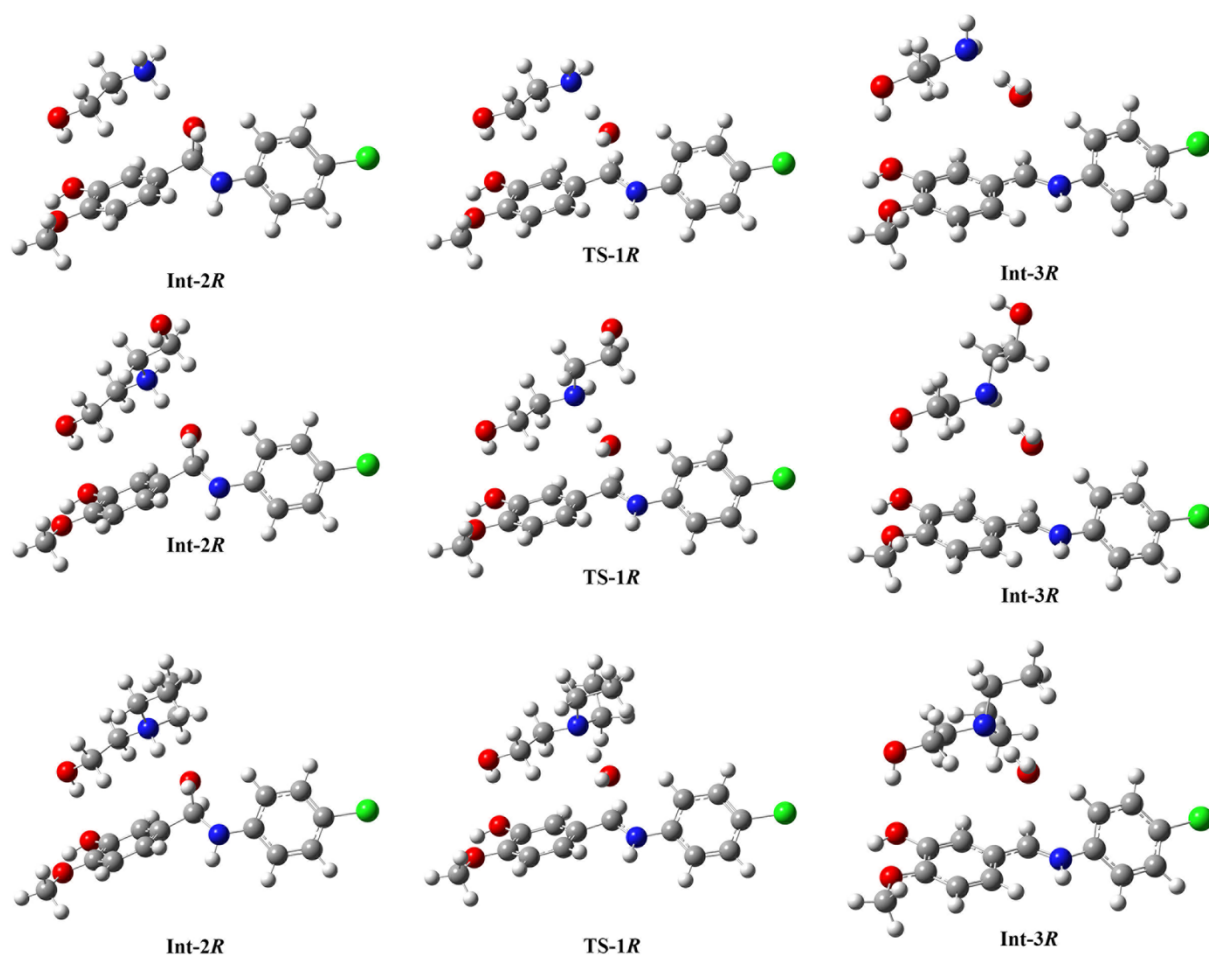

Figure S4. Intermediates and transition states in the transformation of **Int-2R** catalyzed with [HDEA][ClAc], [HMEA][ClAc] and [HDEAE][ClAc].

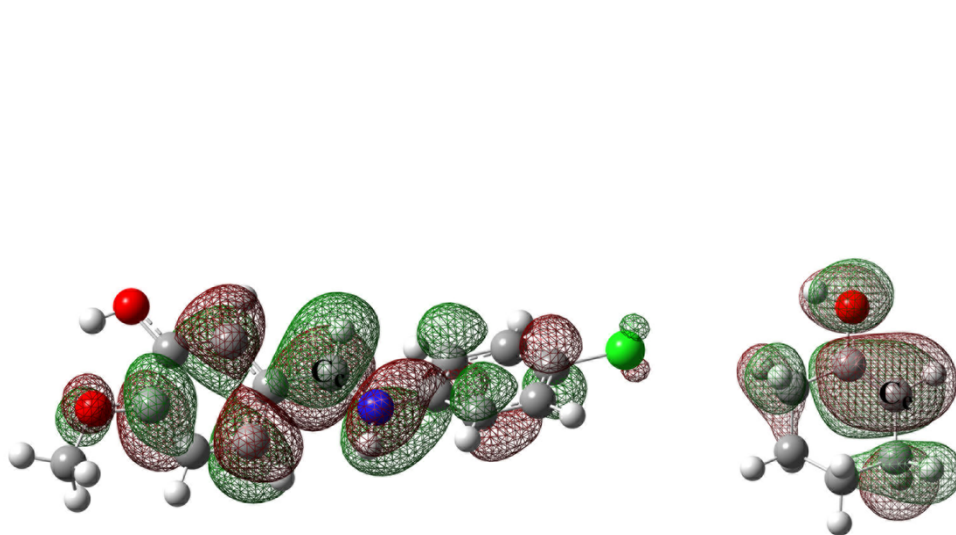

Figure S5. LUMO of the imminium ion and HOMO of the enol.

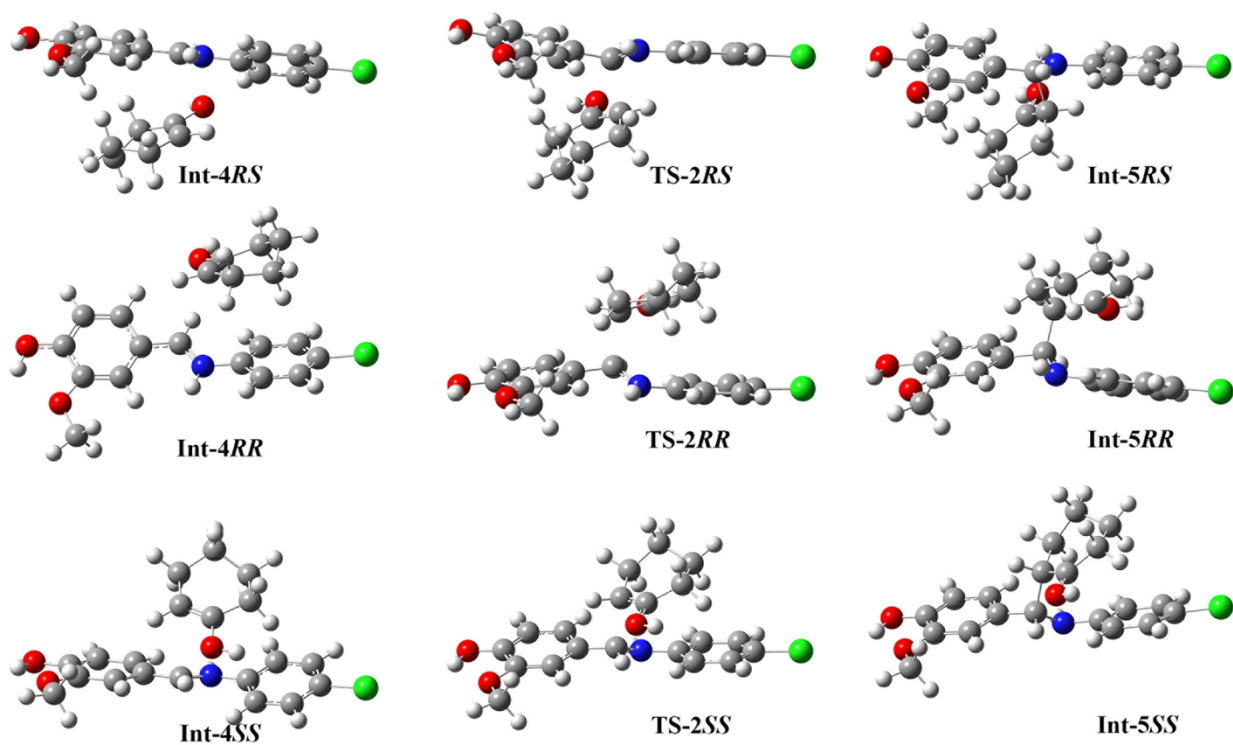

Figure S6. Reactant complexes **Int-4RS**, **Int-4SS**, and **Int-4RR**, and transition states **TS-2RS**, **TS-2SS**, and **TS-2RR**.

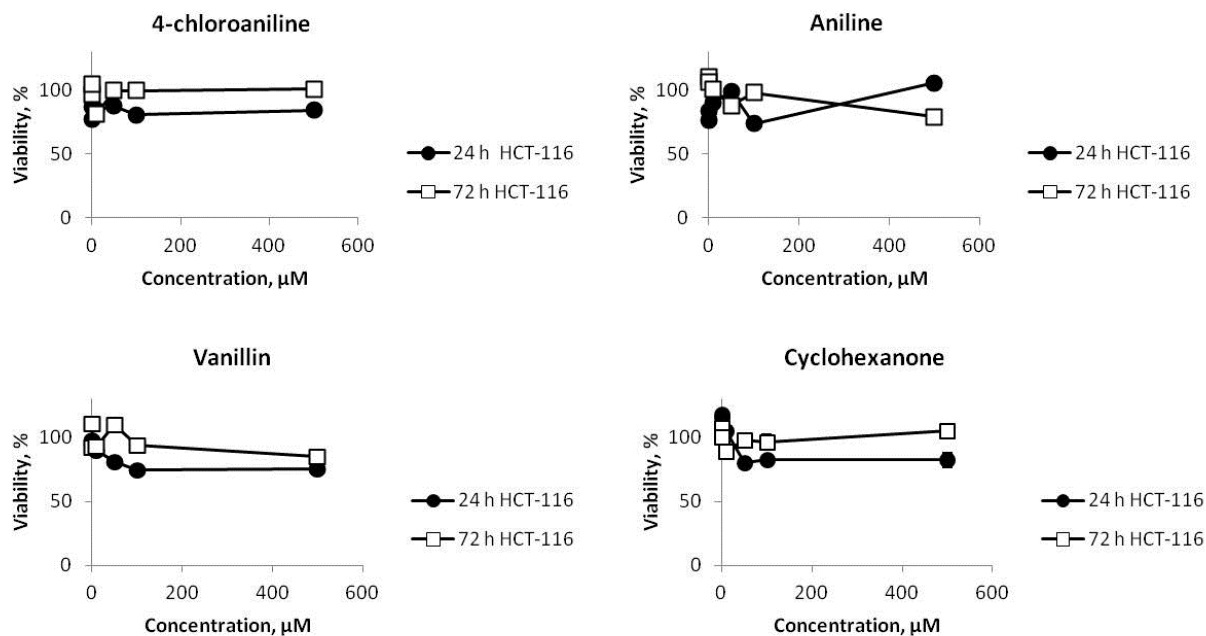

Figure S7. Growth inhibitory effects of the starting compounds on HCT-116 cell line.



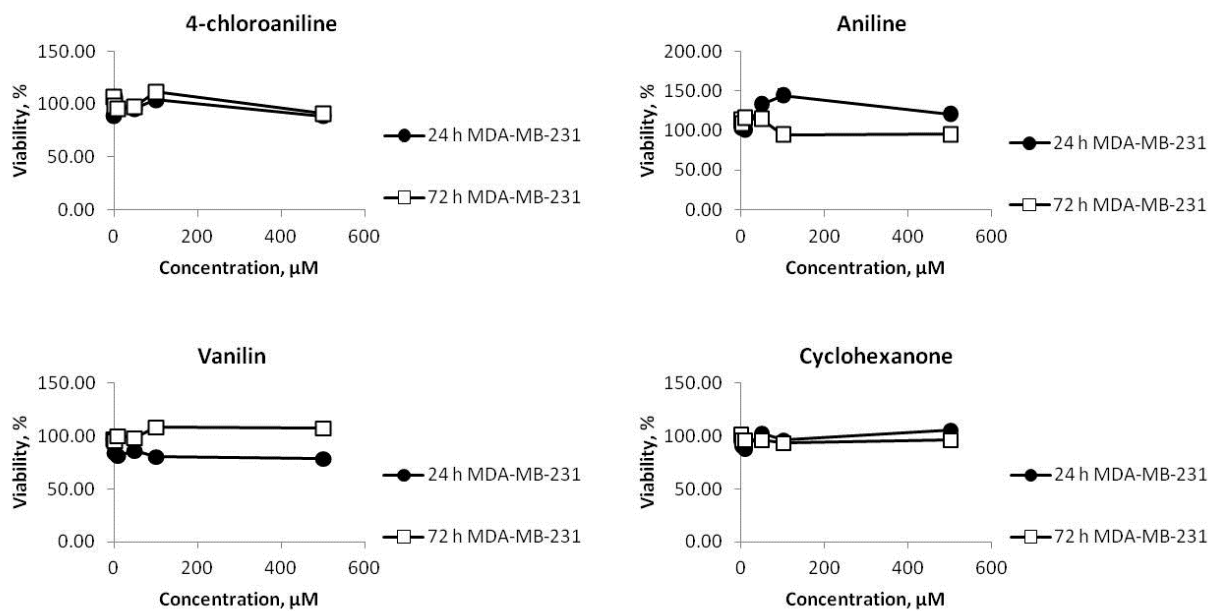

Figure S8. Growth inhibitory effects of the starting compounds on MDA-MB-231 cell line.

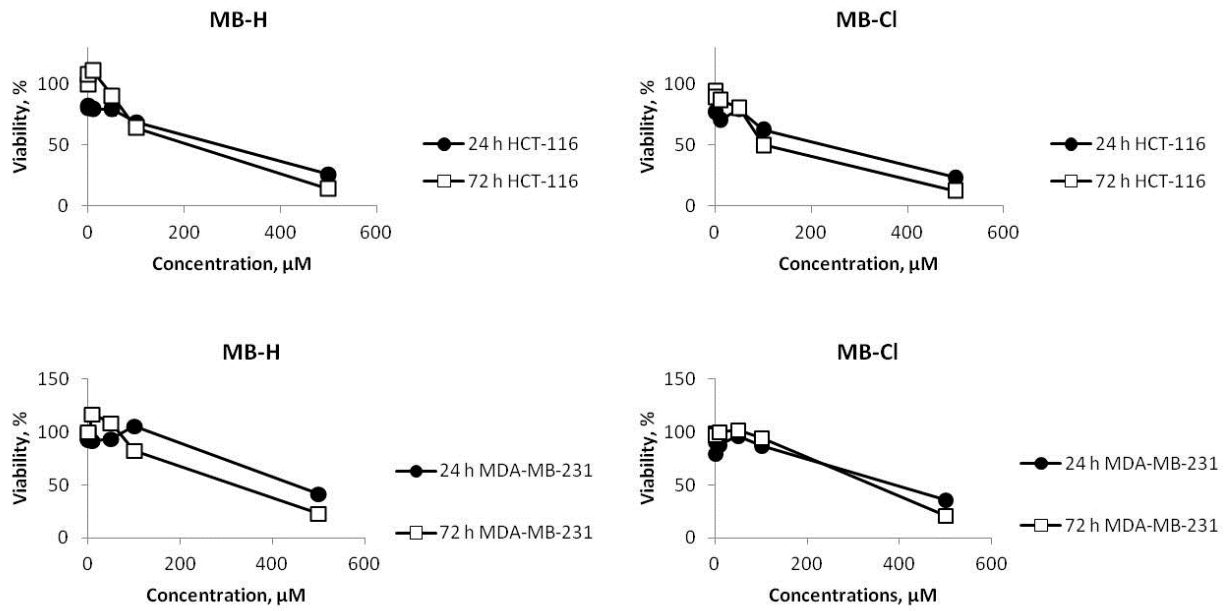

Figure S9. Growth inhibitory effects of MB-H and MB-Cl on HCT-116 and MDA-MB-231 cell lines

Table S1. Energy profiles for the ILs catalyzed transformation of **Int-1** (*R* isomer). The free energy values (kJ/mol) were calculated relative to **Int-2**.

| Catalyst      | <b>Int-2</b> | <b>TS-1</b> | <b>Int-3</b> |
|---------------|--------------|-------------|--------------|
| [HDEA][ClAc]  | 0.0          | 55.7        | 33.3         |
| [HMEA][ClAc]  | 0.0          | 58.7        | 14.3         |
| [HDEAE][ClAc] | 0.0          | 76.9        | 43.7         |

MB-Cl  $^1\text{H}$  NMR

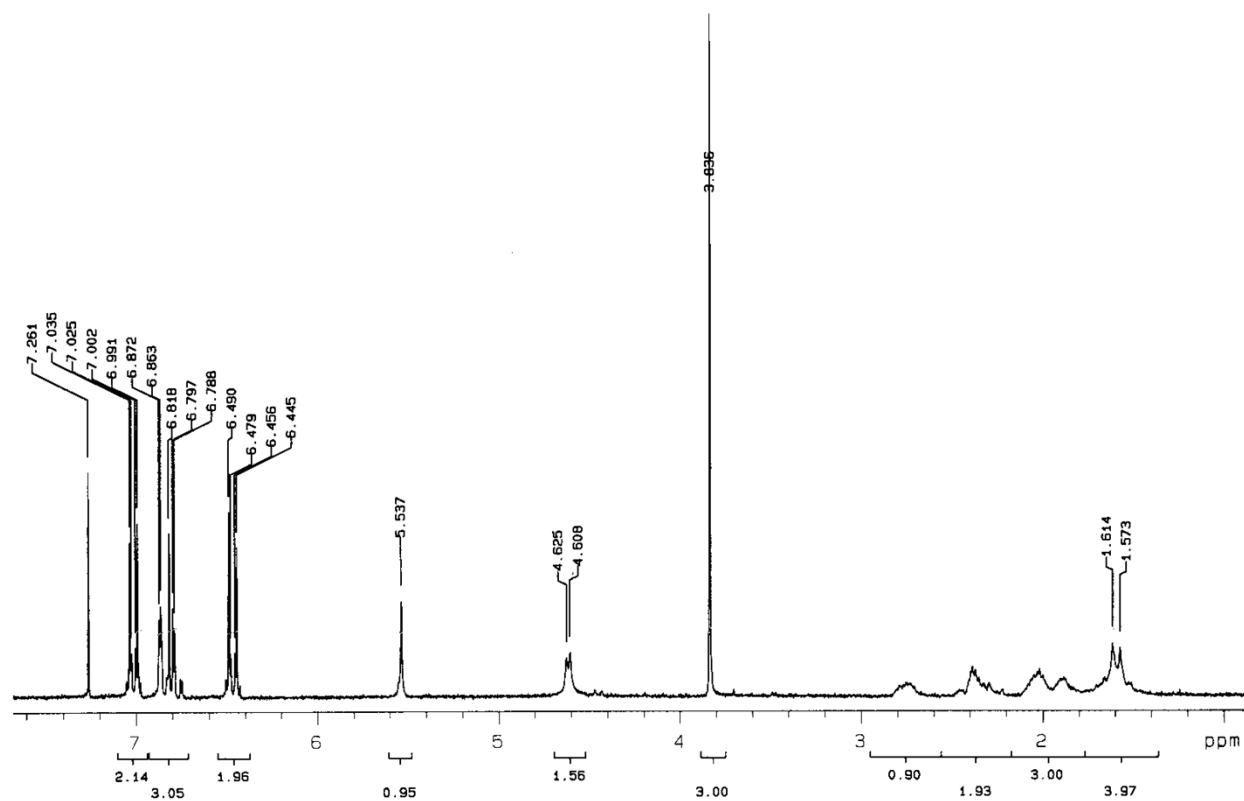

MB-Cl  $^{13}\text{C}$  NMR

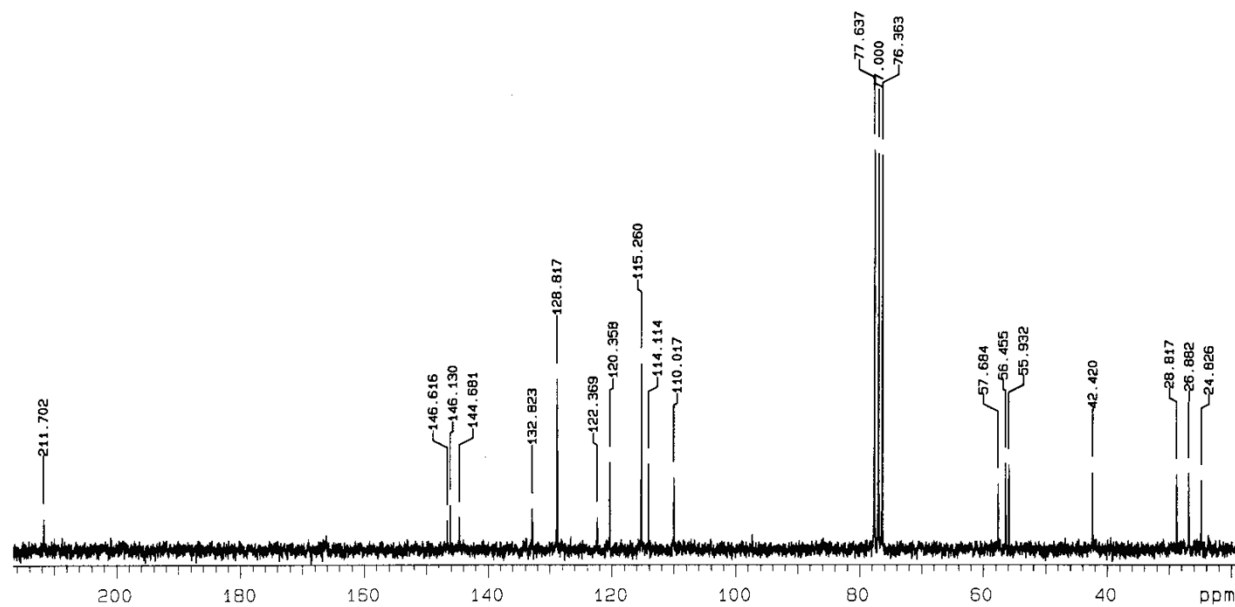

MB-H  $^1\text{H}$  NMR

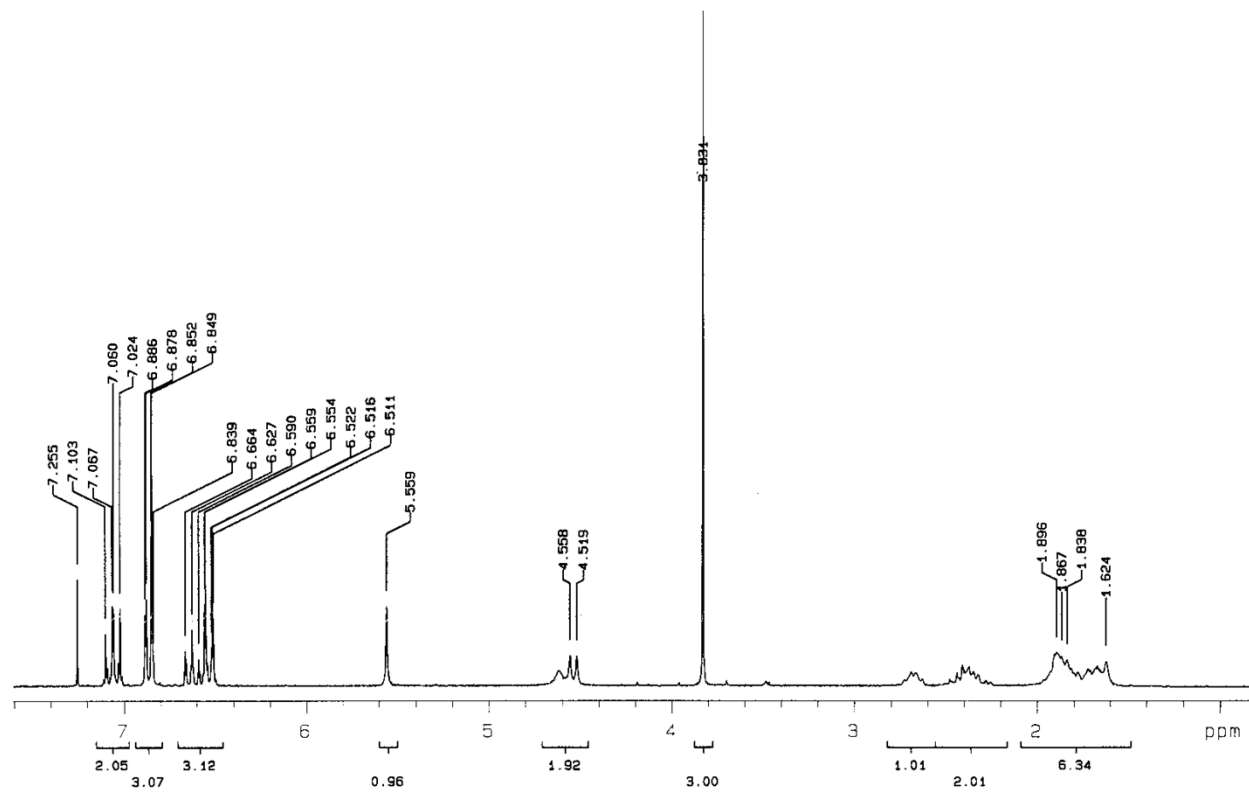

MB-H  $^{13}\text{C}$  NMR

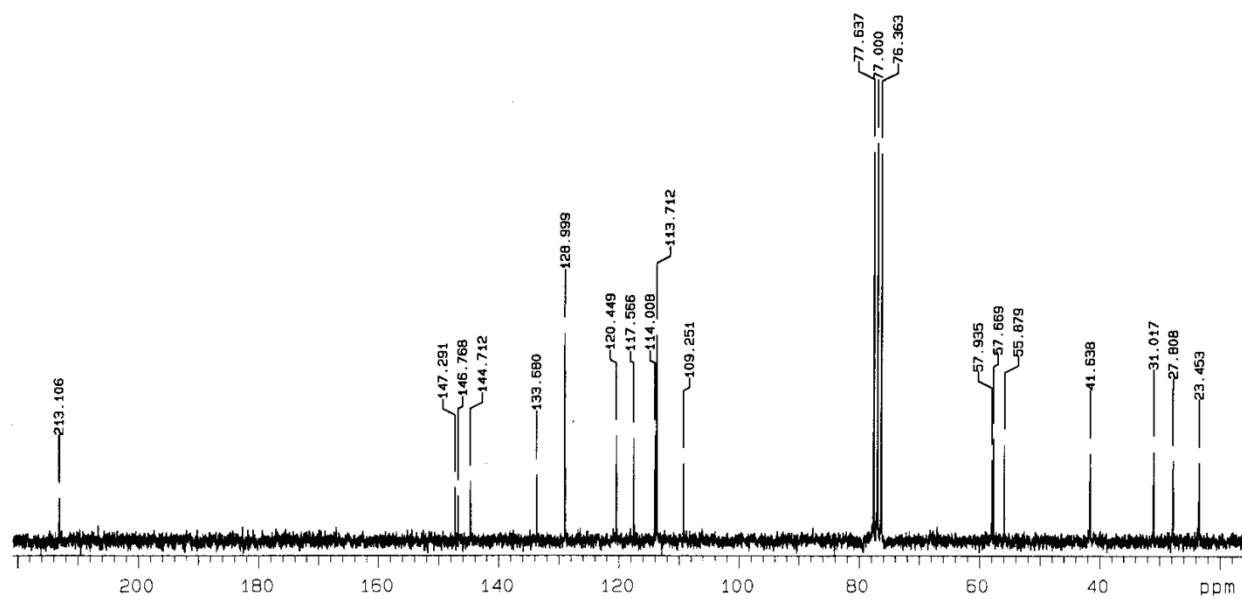

# ESI-MS MB-Cl

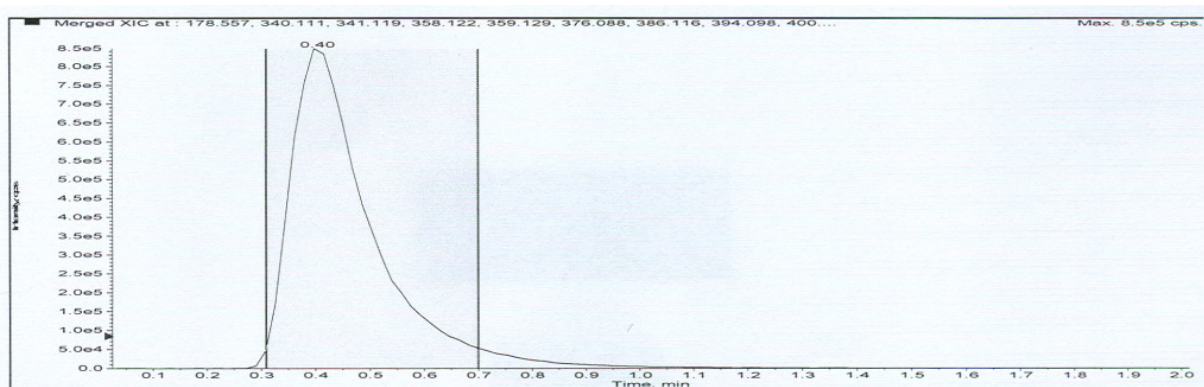

Merged XIC, Period#: 1 Experiment#: 1

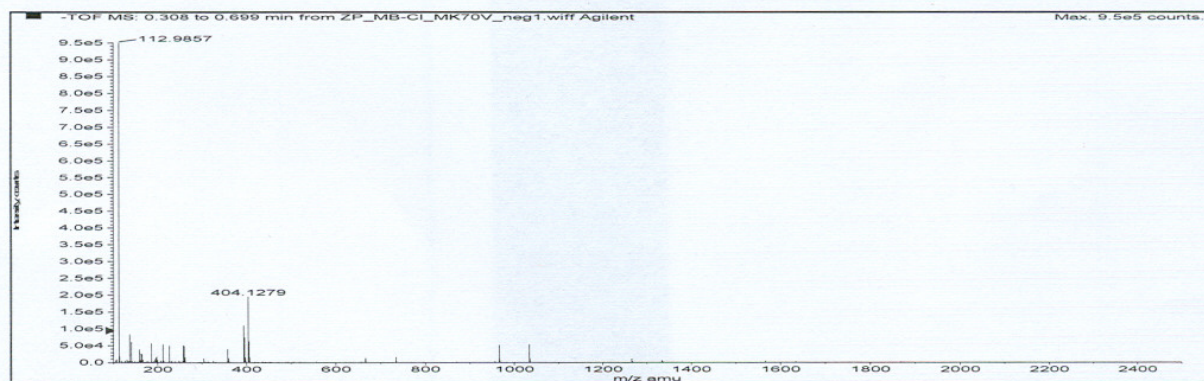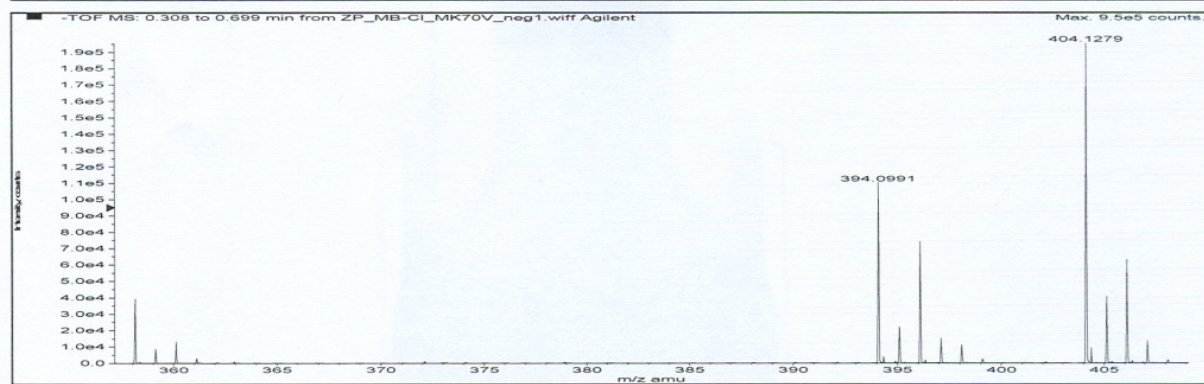

| Formula                                            | Compound name | Mass      | Peak RT (min) | Peak area  | Description |
|----------------------------------------------------|---------------|-----------|---------------|------------|-------------|
| C <sub>20</sub> H <sub>22</sub> NO <sub>3</sub> Cl | --            | 359.12882 | 0.40          | 8.67711 E6 | --          |

| Species   | Abundance (counts) | Ion Mass  | Measured Mass | Error (mDa) | Error (ppm) | Ret. Time Error (min) |
|-----------|--------------------|-----------|---------------|-------------|-------------|-----------------------|
| [M-H]-    | 39562.57           | 358.12154 | 358.12247     | 0.92653     | 2.59        | --                    |
| [M+Cl]-   | 113751.31          | 394.09822 | 394.09906     | 0.83606     | 2.12        | --                    |
| [M+HCOO]- | 197614.69          | 404.12702 | 404.12791     | 0.88716     | 2.20        | --                    |



# ESI-MS MB-H

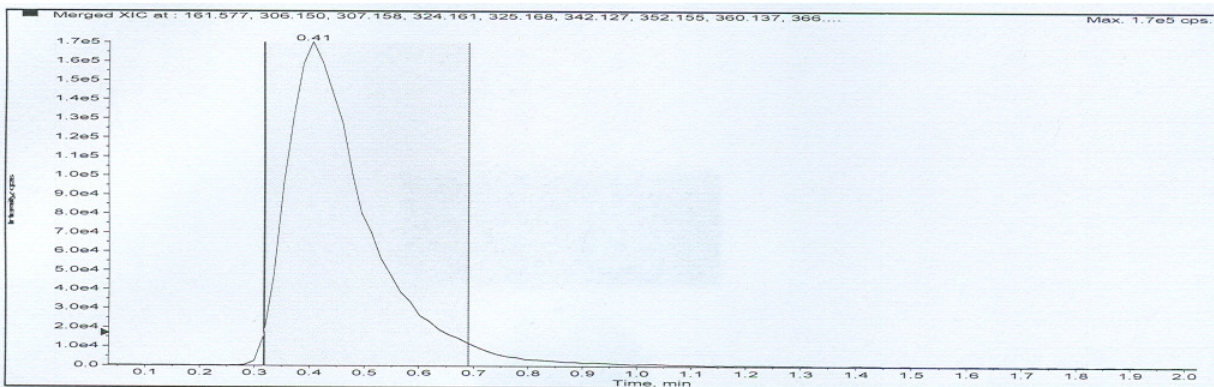

Merged XIC, Period# : 1 Experiment# : 1

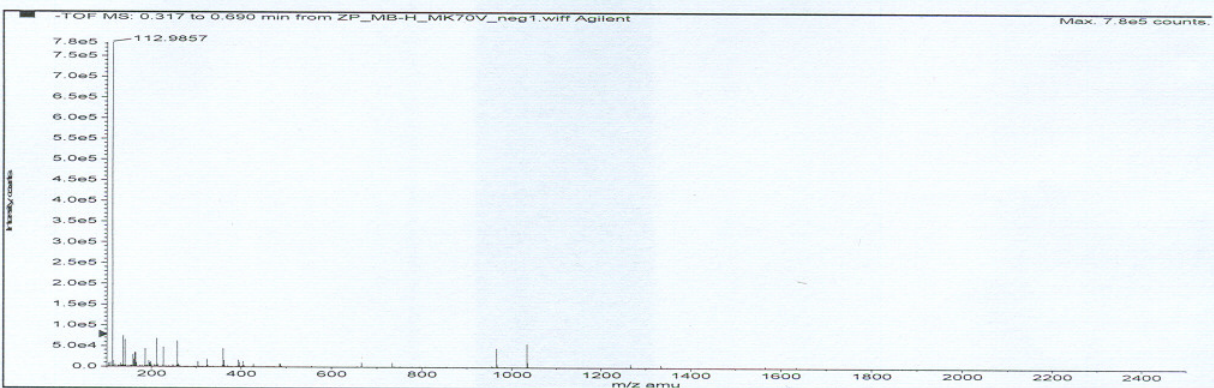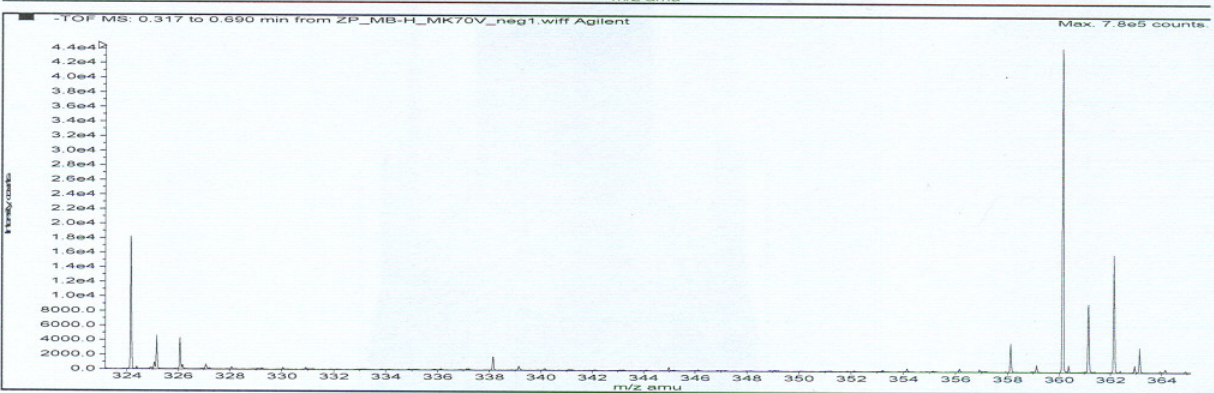

| Formula   | Compound name | Mass      | Peak RT (min) | Peak area  | Description |
|-----------|---------------|-----------|---------------|------------|-------------|
| C20H23NO3 | --            | 325.16779 | 0.41          | 1.71673 E6 | --          |

| Species | Abundance (counts) | Ion Mass  | Measured Mass | Error (mDa) | Error (ppm) | Ret. Time Error (min) |
|---------|--------------------|-----------|---------------|-------------|-------------|-----------------------|
| [M-H]-  | 19551.22           | 324.16052 | 324.16117     | 0.65461     | 2.02        | --                    |
| [M+Cl]- | 47840.74           | 360.13719 | 360.13748     | 0.28213     | 0.78        | --                    |
